1     **Infection of *Borrelia burgdorferi* sensu lato of small mammals in**  
2                                   **Yunnan Province, China**

3     **Zhi-hai He<sup>1#</sup>, Bao-gui Jiang<sup>2#</sup>, Zi-hou Gao<sup>1</sup>, Zong-ti Shao<sup>1</sup>, Yun Zhang<sup>1</sup>, Zheng-xiang**  
4     **Liu<sup>1</sup>, Yu-qiong Li<sup>1</sup>, En-nian Pu<sup>1</sup>, Li Tang<sup>1</sup>, Ming-guo Yao<sup>1</sup>, Na Jia<sup>2</sup>, Michael E. von**  
5     **Fricken<sup>3</sup>, Jia-fu Jiang<sup>2\*</sup>, Wu-chun Cao<sup>2\*</sup> and Chun-hong Du<sup>1\*</sup>**

6     <sup>1</sup> Yunnan Institute of Endemic Diseases Control and Prevention, Yunnan, P.R. China

7     <sup>2</sup> State Key Laboratory of Pathogen and Biosecurity, Beijing Institute of Microbiology and  
8     Epidemiology, Beijing, P. R. China

9     <sup>3</sup> George Mason University, Dept. of Global and Community Health, Fairfax, VA, USA

10    **\* Correspondence:**

11    Jia-fu Jiang, 15810174122@139.com;

12    Wu-chun Cao, caowc@bmi.ac.cn;

13    Chun-hong Du, duchunhong006@hotmail.com

14    Short Title: BBSL in small mammals from China

15    #These authors have contributed equally to this work.

16

17    **Abstract**

18    **Background:** Lyme disease is caused by *Borrelia burgdorferi* sensu lato (BBSL) which is

19    usually found in wild and domestic mammals worldwide. Human cases of *B. burgdorferi*

20    infections have been identified in China, but little direct surveillance of potential rodent

21    reservoirs has been performed in Yunnan Province, Southwestern China. Yunnan Province is

22    a tropical area with a diverse topographic range and sustains a high biodiversity of small

23    mammals that could potentially play an important role in the transmission of a variety of *B.*

24    *burgdorferi* sensu lato species.

25    **Methods:** 3659 small mammals were captured in 159 sample sites located in 23 counties

26    in Yunnan Province and screened for BBSL infection by nested PCR based on 5S-23S rRNA

27    intergenic spacer gene of BBSL. Univariate and multivariate forward stepwise logistic

28    regression analysis was used to assess the association between infections and related risk

29    factors.

30    **Results:** Infection with BBSL was confirmed in 3.99% (146/3659) of small mammals.

31 Significant differences in prevalence rates of BBSL were observed at varying landscape types  
32 and altitudes. Small mammals in forested areas had higher prevalence rates than other  
33 landscape types as did small mammals found at altitudes greater than 2500 meters. The  
34 5S-23S rRNA intergenic spacer revealed that there were 5 genotype of BBSL, including  
35 *B. afzelii*, *B. burgdorferi sensu stricto*, *B. japonica*, *B. garinii* and *B. valaisiana*, which  
36 demonstrate the genetic diversity and regional distribution.

37 **Conclusions:** There exists a wide distribution and genetic diversity of endemic BBSL in  
38 Southwestern China, warranting further investigations and monitoring of clinical disease in  
39 individuals presenting with symptoms of Lyme disease in these areas.

40

#### 41 **Author summary**

42 Lyme disease is caused by *Borrelia burgdorferi sensu lato* (BBSL) which is usually found in  
43 wild and domestic mammals worldwide. Human cases of *Borrelia burgdorferi sensu lato*  
44 infections have been identified in China, but little direct surveillance of potential rodent  
45 reservoirs has been performed in Southwestern China. This study documents potential small  
46 mammal reservoir hosts collected from a large of sample sites from different landscape types  
47 and altitudes, with PCR and sequencing identifying the wide distribution and genetic diversity  
48 of endemic *Borrelia burgdorferi sensu lato* in Southwestern China. This was the first report  
49 that *B. japonica* was detected in *Apodemus draco* and *Niviventer excelsior* in China. This  
50 study adds to body of literature on *Borrelia burgdorferi sensu lato* in China. This work will  
51 provide insight regarding small mammals to target for surveillance and we assess the  
52 association between gender, developmental stage of rodents, environmental landscape and  
53 altitude to better prevent human exposure.

54

#### 55 **Introduction**

56 Lyme borreliosis (LB) is the most commonly reported vector-borne disease across Europe,  
57 North America and Asia [1-4]. The causative agents of LB fall within the species complex *B.*

58 *burgdorferi* sensu lato (BBSL), and is responsible for a wide spectrum of clinical symptoms.  
59 Anti-Borrelia antibodies in rats and humans have been reported in 9 counties and 4 counties  
60 of Yunnan, respectively. While there have been documented reports of human cases of Lyme  
61 disease in southwestern China[4], the only information on the prevalence of BBSL in rodent  
62 reservoirs came from one study, where a majority of rodents were trapped indoors[5]. Yunnan  
63 Province is of particular interest given its wide topographic range and high level of small  
64 mammal biodiversity, many of which may potential reservoirs for BBSL. We performed a  
65 systematic field investigation on the prevalence of BBSL infections in a large quantity of  
66 rodents sampled in 23 counties in Yunnan Province, and then analyzed the distribution and  
67 genetic diversity of BBSL, as well as the association between infections and suspected risk  
68 factors. This study aims to evaluate the role that small mammals play in the transmission of  
69 BBSL across Yunnan Province.

## 70 **Materials and methods**

### 71 **Ethics statement**

72 The research protocol for trapping wild small animals and collecting samples was approved  
73 by the Animal Subjects Research Review Boards at the Yunnan Institute of Endemic Diseases  
74 Control and Prevention (2013-003), in accordance with the medical research regulations of  
75 China and the Regulation of the People's Republic of China for the Implementation of the  
76 Protection of Terrestrial Wildlife.

### 77 **Collection of small mammal samples**

78 From 2011 to 2016, small mammals were captured using animal snap traps set at agricultural,  
79 forested, and residential areas at 159 sample sites from 23 counties ranging from 530 to  
80 4300m in Yunnan Province (Table 1). Two hundred snap traps per sample site were placed  
81 for three consecutive nights and checked daily. Mammal species were identified according to  
82 external morphology, fur color, measurements and visible characters of dentition. Each  
83 animal's sex, developmental stage, and location was recorded at the time of sample  
84 processing. After identification of species, spleen tissues were removed from the animals and

85 stored in liquid nitrogen until tested. For unidentified species in the field, the craniums were  
86 brought to the laboratory for further identification.

### 87 **DNA extraction and PCR analysis**

88 DNA was extracted from spleen tissue using the DNA blood and tissue kit (Tiangen  
89 Biotechnology, Beijing, China) according to the manufacturer's instruction. A nested PCR for  
90 the 5S-23S rRNA intergenic spacer gene of BBSL was done as previously described[6]. The  
91 PCR-positive amplicons were directly sequenced with an automated DNA sequencer (ABI  
92 PRISM 373; Perkin-Elmer, Norwalk, CT). Sequence analysis was carried out using a FASTA  
93 search on the Genbank database, with phylogenetic trees constructed using MEGA software,  
94 version 6.06[7]. The 5S-23S rRNA intergenic spacer gene of BBSL obtained in this study  
95 were deposited in Genbank under accession numbers MK333406-MK33427 and KP677523.1  
96 respectively.

### 97 **Statistical analysis**

98 Univariate analysis was used to access the association between gender, developmental stage  
99 of rodents, environmental landscape, altitude, and testing positive for BBSL using a  
100 chi-square test. All variables with a *P*-value of <0.05 from univariate analysis were entered  
101 into a multivariate forward stepwise logistic regression analysis. All analyses were conducted  
102 using SPSS (version 17.0, SPSS Inc. Chicago, IL).

103

## 104 **Results**

105 A total of 3659 small mammals belonging to 57 species, 29 genera and 10 families from 5  
106 orders were collected (Table 1). The *Apodemus draco* was the most common species (15.82%,  
107 579/3659), followed by *Rattus tanezumi* (15.66%, 573/3659). A total of 146 (3.99%)  
108 rodentstested positive for BBSL, with *Ochotona gloveri* (33.33%, 1/3), *Sorex cylindricauda*  
109 (14.28%, 7/49), *Soriculusleucops* (14.94%,13/87), and *Rattus tuekkestanicus* (14.28%, 1/7)  
110 actively infected with BBSL (Table 2). The positive mammals originated from 14 out of 23  
111 sample counties, including Deqin, Weixi, Yulong, Gongshan, Fugong, Jinggu, Tengchong,

112 Yongde, Menghai, Yunxian, Shiping, Mile, Yiliang and Yunlong (Table 1), with Gongshan  
 113 (S1) having the highest prevalence (8.58%), followed by Deqin (S2, 7.85%), and Yiliang (S16,  
 114 6.38%). The prevalence of BBSL in small mammals in forested landscapes, agricultural  
 115 landscapes and residential landscapes were 5.19%, 3.14% and 0.63%, respectively. There was  
 116 significant difference in prevalence of BBSL in small mammals at the altitude classes of  
 117 <1500 meters, 1500-2500 meters, >2500 meters with 0.80%, 2.92% and 5.86%, respectively  
 118 ( $\chi^2=43.089$ ,  $p=0.001$ ), and between different landscapes ( $\chi^2=14.945$ ,  $p=0.001$ ) as depicted in  
 119 Table 3. The multivariate logistic regression analysis also revealed that samples found at  
 120 altitudes greater than 1500 meters and in agricultural landscapes were more likely to be  
 121 infected with BBSL (Table 4).

Table 1. Prevalence of BBSL in small mammals from different survey sites.

| Counties   | Sampling site | No. of tested | No. of positive for BBSL (%) | B.a | B.b | B.g | B.j | B.v |
|------------|---------------|---------------|------------------------------|-----|-----|-----|-----|-----|
| Gongshan   | S1            | 711           | 61 (8.58)                    | 39  | 22  | 0   | 0   | 0   |
| Deqin      | S2            | 662           | 52 (7.85)                    | 20  | 1   | 30  | 0   | 1   |
| Shangri-la | S3            | 106           | 0 (0)                        | 0   | 0   | 0   | 0   | 0   |
| Fugong     | S4            | 134           | 1 (0.75)                     | 0   | 1   | 0   | 0   | 0   |
| Weixi      | S5            | 239           | 8 (3.35)                     | 6   | 2   | 0   | 0   | 0   |
| Yulong     | S6            | 224           | 1 (0.45)                     | 1   | 0   | 0   | 0   | 0   |
| Jianchuan  | S7            | 112           | 0 (0)                        | 0   | 0   | 0   | 0   | 0   |
| Lushui     | S8            | 114           | 0 (0)                        | 0   | 0   | 0   | 0   | 0   |
| Yunlong    | S9            | 177           | 2 (1.13)                     | 0   | 0   | 0   | 2   | 0   |
| Tengchong  | S10           | 39            | 1 (2.56)                     | 0   | 0   | 0   | 0   | 1   |
| Yingjiang  | S11           | 38            | 0 (0)                        | 0   | 0   | 0   | 0   | 0   |
| Yongde     | S12           | 215           | 3 (1.40)                     | 2   | 0   | 0   | 0   | 1   |
| Yunxian    | S13           | 68            | 1 (1.47)                     | 0   | 0   | 0   | 0   | 1   |
| Jinggu     | S14           | 76            | 1 (1.32)                     | 1   | 0   | 0   | 0   | 0   |
| Ninger     | S15           | 88            | 0 (0)                        | 0   | 0   | 0   | 0   | 0   |
| Yiliang    | S16           | 94            | 6 (6.38)                     | 6   | 0   | 0   | 0   | 0   |
| Shiping    | S17           | 128           | 6 (4.69)                     | 5   | 1   | 0   | 0   | 0   |
| Mile       | S18           | 110           | 2 (1.82)                     | 2   | 0   | 0   | 0   | 0   |
| Mengzi     | S19           | 22            | 0 (0)                        | 0   | 0   | 0   | 0   | 0   |
| Jinping    | S20           | 27            | 0 (0)                        | 0   | 0   | 0   | 0   | 0   |

|         |     |      |            |    |    |    |   |   |
|---------|-----|------|------------|----|----|----|---|---|
| Wenshan | S21 | 17   | 0 (0)      | 0  | 0  | 0  | 0 | 0 |
| Menghai | S22 | 177  | 1 (0.56)   | 1  | 0  | 0  | 0 | 0 |
| Mengla  | S23 | 81   | 0 (0)      | 0  | 0  | 0  | 0 | 0 |
| Total   |     | 3659 | 146 (3.99) | 83 | 27 | 30 | 2 | 4 |

---

Table 2. Prevalence of *Borrelia burgdorferi* sensu lato in small mammals of different species.

| Orders  | Families | Genera        | Species                      | No.of tested                 | No. of positive (%)       | B.a       | B.b       | B.g | B.v | B.j |   |   |
|---------|----------|---------------|------------------------------|------------------------------|---------------------------|-----------|-----------|-----|-----|-----|---|---|
| Rodetia | Muridae  | <i>Rattus</i> | <i>Rattus tanezumi</i>       | 573                          | 4 (0.70)                  | 3         | 0         | 0   | 1   | 0   |   |   |
|         |          |               | <i>Rattus nitidus</i>        | 69                           | 0 (0)                     | 0         | 0         | 0   | 0   | 0   |   |   |
|         |          |               | <i>Rattus tuekkestanicus</i> | 7                            | 1 (14.29)                 | 1         | 0         | 0   | 0   | 0   |   |   |
|         |          |               |                              | <i>Rattus norvegicus</i>     | 16                        | 2 (12.50) | 1         | 1   | 0   | 0   | 0 |   |
|         |          |               |                              | <i>Rattus brunneusculus</i>  | 94                        | 2 (2.13)  | 1         | 0   | 0   | 1   | 0 |   |
|         |          |               | <i>Apodemus</i>              | <i>Apodemuslatronum</i>      | 166                       | 9 (5.42)  | 1         | 1   | 7   | 0   | 0 |   |
|         |          |               |                              | <i>Apodemuschevrieri</i>     | 402                       | 20 (4.98) | 16        | 1   | 3   | 0   | 0 |   |
|         |          |               |                              | <i>Apodemusdraco</i>         | 579                       | 19 (3.28) | 10        | 5   | 3   | 0   | 1 |   |
|         |          |               | <i>Mus</i>                   | <i>Mus caroli</i>            | 75                        | 3 (4.00)  | 3         | 0   | 0   | 0   | 0 |   |
|         |          |               |                              | <i>Mus pahari</i>            | 91                        | 6 (6.59)  | 6         | 0   | 0   | 0   | 0 |   |
|         |          |               |                              | <i>Mus musculus</i>          | 12                        | 0 (0)     | 0         | 0   | 0   | 0   | 0 |   |
|         |          |               | <i>Niviventer</i>            | <i>Niviventerandersoni</i>   | 57                        | 3 (5.26)  | 0         | 0   | 2   | 1   | 0 |   |
|         |          |               |                              | <i>Niviventercoxingi</i>     | 2                         | 0 (0)     | 0         | 0   | 0   | 0   | 0 |   |
|         |          |               |                              | <i>Niviventer brahma</i>     | 1                         | 0 (0)     | 0         | 0   | 0   | 0   | 0 |   |
|         |          |               |                              | <i>Niviventerreha</i>        | 32                        | 2 (6.25)  | 0         | 2   | 0   | 0   | 0 |   |
|         |          |               |                              | <i>Niviventerconfucianus</i> | 144                       | 14 (9.72) | 6         | 1   | 7   | 0   | 0 |   |
|         |          |               |                              | <i>Niviventer excelsior</i>  | 29                        | 1 (3.45)  | 0         | 0   | 0   | 0   | 1 |   |
|         |          |               |                              | <i>Niviventerfulvescens</i>  | 7                         | 0 (0)     | 0         | 0   | 0   | 0   | 0 |   |
|         |          |               | <i>Vernaya</i>               | <i>Vernaya fulva</i>         | 7                         | 0 (0)     | 0         | 0   | 0   | 0   | 0 |   |
|         |          |               | <i>Micromys</i>              | <i>Micromys minutus</i>      | 1                         | 0 (0)     | 0         | 0   | 0   | 0   | 0 |   |
|         |          |               | <i>Bandicota</i>             | <i>Bandicotaindica</i>       | 2                         | 0 (0)     | 0         | 0   | 0   | 0   | 0 |   |
|         |          |               | <i>Berylmys</i>              | <i>Berylmys bowersi</i>      | 7                         | 0 (0)     | 0         | 0   | 0   | 0   | 0 |   |
|         |          |               | <i>Leopoldamys</i>           | <i>Leopoldamys edwardsi</i>  | 6                         | 0 (0)     | 0         | 0   | 0   | 0   | 0 |   |
|         |          |               | Cricetidae                   | <i>Eothenomys</i>            | <i>Eothenomys miletus</i> | 113       | 0 (0)     | 0   | 0   | 0   | 0 | 0 |
|         |          |               |                              |                              | <i>Eothenomys eleusis</i> | 160       | 12 (7.50) | 8   | 4   | 0   | 0 | 0 |

|             |                |                           |                             |           |            |   |   |   |   |   |
|-------------|----------------|---------------------------|-----------------------------|-----------|------------|---|---|---|---|---|
|             |                | <i>Eothenomyscachinus</i> | 38                          | 4 (10.53) | 3          | 1 | 0 | 0 | 0 |   |
|             |                | <i>Eothenomys custos</i>  | 95                          | 2 (2.11)  | 1          | 1 | 0 | 0 | 0 |   |
|             |                | <i>Eothenomysproditor</i> | 7                           | 0 (0)     | 0          | 0 | 0 | 0 | 0 |   |
|             |                | <i>Eothenomysolitor</i>   | 7                           | 0 (0)     | 0          | 0 | 0 | 0 | 0 |   |
|             | <i>Pitymys</i> | <i>Pitymysleucurus</i>    | 42                          | 1 (2.38)  | 0          | 0 | 1 | 0 | 0 |   |
|             | <i>Volemys</i> | <i>Volemysclarkei</i>     | 35                          | 2 (5.71)  | 1          | 0 | 1 | 0 | 0 |   |
|             | Sciuridae      | <i>Dremomys</i>           | <i>Dremomyspernyi</i>       | 26        | 3 (11.54)  | 0 | 0 | 3 | 0 | 0 |
|             |                | <i>Marmota</i>            | <i>Marmota himalayana</i>   | 14        | 0 (0)      | 0 | 0 | 0 | 0 | 0 |
|             |                | <i>Tamiops</i>            | <i>Tamiopsswinhoei</i>      | 7         | 0 (0)      | 0 | 0 | 0 | 0 | 0 |
|             | Dipodidae      | <i>Eozapus</i>            | <i>Eozapussetchuanus</i>    | 2         | 0 (0)      | 0 | 0 | 0 | 0 | 0 |
| Insectivora | Soricidae      | <i>Crocidura</i>          | <i>Crociduralasiura</i>     | 1         | 0 (0)      | 0 | 0 | 0 | 0 | 0 |
|             |                |                           | <i>Crociduraattenuata</i>   | 41        | 2 (4.88)   | 1 | 0 | 0 | 1 | 0 |
|             |                |                           | <i>Crocidurahorsfieldi</i>  | 2         | 0 (0)      | 0 | 0 | 0 | 0 | 0 |
|             |                |                           | <i>Crocidurasuaveolens</i>  | 3         | 0 (0)      | 0 | 0 | 0 | 0 | 0 |
|             |                |                           | <i>Crociduradracula</i>     | 62        | 1 (1.61)   | 1 | 0 | 0 | 0 | 0 |
|             |                |                           | <i>Crocidurarussula</i>     | 33        | 0 (0)      | 0 | 0 | 0 | 0 | 0 |
|             |                | <i>Soriculus</i>          | <i>Soriculuscaudatus</i>    | 46        | 1 (2.17)   | 1 | 0 | 0 | 0 | 0 |
|             |                |                           | <i>Soriculusleucops</i>     | 87        | 13 (14.94) | 6 | 7 | 0 | 0 | 0 |
|             |                | <i>Sorex</i>              | <i>Sorexalpinus</i>         | 25        | 1 (4.00)   | 1 | 0 | 0 | 0 | 0 |
|             |                |                           | <i>Sorexylindricauda</i>    | 49        | 7 (14.28)  | 6 | 1 | 0 | 0 | 0 |
|             |                |                           | <i>Sorexnegresscens</i>     | 5         | 0 (0)      | 0 | 0 | 0 | 0 | 0 |
|             |                | <i>Anourosorex</i>        | <i>Anourosorexsquamipes</i> | 114       | 2 (1.75)   | 0 | 2 | 0 | 0 | 0 |
|             |                | <i>Suneus</i>             | <i>Suneusmurinus</i>        | 59        | 1 (1.69)   | 1 | 0 | 0 | 0 | 0 |
|             | Erinaceidae    | <i>Hylomys</i>            | <i>Hylomyssuillus</i>       | 14        | 0 (0)      | 0 | 0 | 0 | 0 | 0 |
|             |                | <i>Neotetracus</i>        | <i>Neotetracussinensis</i>  | 19        | 0 (0)      | 0 | 0 | 0 | 0 | 0 |
|             | Talpidae       | <i>Scaptonyx</i>          | <i>Scaptonyxfusicaudus</i>  | 5         | 0 (0)      | 0 | 0 | 0 | 0 | 0 |
|             |                | <i>Nasillus</i>           | <i>Nasillusgracilis</i>     | 31        | 1 (3.23)   | 1 | 0 | 0 | 0 | 0 |



|            |             |                 |                           |      |            |    |    |    |   |   |
|------------|-------------|-----------------|---------------------------|------|------------|----|----|----|---|---|
| Lagomorpha | Ochotonidae | <i>Ochotona</i> | <i>Ochotona thibetana</i> | 92   | 6 (6.52)   | 3  | 0  | 3  | 0 | 0 |
|            |             |                 | <i>Ochotona gloveri</i>   | 3    | 1 (33.33)  | 1  | 0  | 0  | 0 | 0 |
| Scandentia | Tupaiaidae  | <i>Tupaia</i>   | <i>Tupaia belangeri</i>   | 40   | 0 (0)      | 0  | 0  | 0  | 0 | 0 |
| Carnivora  | Mustelidae  | <i>Mustela</i>  | <i>Mustela sibirica</i>   | 2    | 0 (0)      | 0  | 0  | 0  | 0 | 0 |
|            |             | <i>Meles</i>    | <i>Meles meles</i>        | 1    | 0 (0)      | 0  | 0  | 0  | 0 | 0 |
| Total      |             |                 |                           | 3659 | 146 (3.99) | 83 | 27 | 30 | 4 | 2 |

---

Table 3. Risk factors related to *Borrelia burgdorferi* sensu lato based on univariate analyses.

| variable     | simple size           |                   | BBSL Infection |          |
|--------------|-----------------------|-------------------|----------------|----------|
|              | constituent ratio (%) | positive rate (%) | $\chi^2$       | <i>P</i> |
| altitude (m) |                       |                   |                |          |
| ~1500        | 868/3659 (23.72%)     | 7/868 (0.81%)     | 43.089         | 0.001    |
| 1500~2500    | 823/3659 (22.49%)     | 24/823 (2.92%)    |                |          |
| 2500~        | 1968/3659 (53.79%)    | 115/1968 (5.84%)  |                |          |
| gender       |                       |                   |                |          |
| male         | 1753/3659 (47.91%)    | 81/1753 (4.62%)   | 3.492          | 0.062    |
| female       | 1906/3659 (52.09%)    | 65/1906 (3.41%)   |                |          |
| age          |                       |                   |                |          |
| adult        | 3337/3659 (91.20%)    | 133/3337 (3.99%)  | 0.002          | 0.964    |
| pubertal     | 322/3659 (8.80%)      | 13/322 (4.04%)    |                |          |
| landscape    |                       |                   |                |          |
| residential  | 158/3659 (4.32%)      | 1/158 (0.63%)     | 14.945         | 0.001    |
| agricultural | 1786/3659 (48.81%)    | 56/1786 (3.14%)   |                |          |
| forest       | 1715/3659 (46.87%)    | 89/1715 (5.19%)   |                |          |
| Total        |                       | 146/3659 (3.99%)  |                |          |

Table 4. Risk factors related to BBSL based on multivariate logistic regression.

| Variable                  | OR (95% CI)            | <i>p</i> |
|---------------------------|------------------------|----------|
| <b>Altitude (m)</b>       |                        |          |
| <1500                     | <b>1</b>               |          |
| 1500-2500                 | 4.524 (1.979~10.339)   | <0.01    |
| >2500                     | 24.489 (11.351~52.833) | <0.01    |
| <b>Landscape category</b> |                        |          |
| <b>residential</b>        | <b>1</b>               |          |
| forest                    | 5.617 (0.769~41.052)   | 0.089    |
| agricultural              | 8.412 (1.150~61.528)   | 0.036    |
| <b>forest</b>             | <b>1</b>               |          |
| residential               | 0.178 (0.024~1.301)    | 0.089    |
| agricultural              | 1.497 (1.153~1.944)    | 0.002    |

123

124

125

126

127

128

129

Sequencing was successful for all 146 positives amplicons samples. The comparative analysis with the BLAST program revealed that 83 samples were *B. afzelii*, 27 were *B. burgdorferi* sensu stricto, 30 were *B. garinii*, four were *B. valaisiana*, and two were *B. japonica*. Deqin county had a distribution of four *Borrelia* spp. except *B. japonica* which was only found in Yunlong county (Table 1). Additionally, four of five *Borrelia* spp. were detected in *Apodemus draco* (Table 2). The nucleotide sequences of the *B. afzelii* sequences

130 were closely related to the sequence from a patient in China (JX888444.1). All *B. burgdorferi*  
131 sensu stricto sequence were identical to the sequence from strain BRE-13 sequenced from a  
132 patient's CSF in France (KY594010.1). *B. garinii* sequences in this study showed 99%  
133 identity with the strain YN12/2012 from *Canis familiaris* in Yunnan Province. *Borrelia*  
134 *japonica* sequences showed 99% identity with strain Cow611C from a tick in Japan  
135 (L30125.1). The *B. valaisiana* sequences were similar to the strain KM2 from *Ixodes*  
136 *granulatus* ticks in Taiwan, China (98%, HM100110.1) and the strain CKA2a from  
137 *Apodemus agrarius* in Zhejiang, China (99%, AB022124.1). Phylogenetic analyses based on  
138 different representative sequences in this study revealed that all detected *Borrelia* fell within  
139 five separate clades belonging to five different types of BBSL including *B. afzelii*, *B.*  
140 *burgdorferi* sensu stricto, *B. garinii*, *B. japonica* and *B. valaisiana* (Fig 1).

141 **Fig 1. Maximun Likelihood phylogenetic tree based on a comparison of *Borrelia***  
142 ***burgdorferi* sensu lato 5S-23S rRNA intergenic spacer gene sequences obtained from**  
143 **Yunnan small mammals with *Borrelia burgdorferi* sensu lato reference strains.** The  
144 number on each branch shows the percent occurrence in 1000 bootstrap replicates. Black  
145 circles stood for novel sequences identified in this study.

146

## 147 **Discussion**

148 Human cases of LB have been confirmed in almost every province found on mainland China  
149 including Yunnan Province. However, most of patients only had serological evidence and  
150 were not confirmed for specific genotypes. BBSL has been reported in small mammals  
151 trapped in the provinces Qinghai, Hunan, Shanxi, Liaoning, Sichuan, Fujian, Zhejiang, Gansu,  
152 Guangdong, Jilin and Yunnan [8-16], suggesting that small mammals are likely the main  
153 reservoir hosts in China. This study presents a large sample size extending over a wide  
154 geographic area, which provides insight into the prevalence, spatial distribution and genetic  
155 diversity of BBSL in small mammals collected in Yunnan Province.

156 We documented BBSL infection in 30 species of small mammal, among which, 20  
157 species had not been previously documented. These species may be infected occasionally,  
158 whether they serve as reservoir hosts need a further study. The *Rattus tanezumi*

159 (573/3659,15.66%) was the predominant species trapped in households in Yunnan. *Apodemus*  
160 *draco* (579/3659,15.82%) and *A. chevrieri*(402/3659,10.99%) were the predominant hosts  
161 species in Yunnan, which was consistent with results from Europe where *Apodemus* are  
162 considered a major reservoir of *Borrelia* [17]. BBSL was detected in *Apodemus draco* and in  
163 *A. chevrieri* in Yunnan, with *A. draco* capable of carrying four *Borrelia* spp. The *Ochotona*  
164 *gloveri*, *Soriculus leucops* and *Rattus tuekkestanicus* also had a much higher  
165 prevalence(>14%) with much larger sample sizes in this study than in other provinces in  
166 China [12,18-22]. *Rattus norvegicus* is the prominent household species in Yunnan, which  
167 had a high prevalence(12.50%) and was detected positive for pathogenic genotypes (*B. afzelii*  
168 and *B. burgdorferi* sensu stricto). We also found that the uncommon species *Sorex*  
169 *cylindricauda* in this study tested positive for BBSL DNA, requiring further investigation to  
170 fully understand their role in maintaining or amplifying infections in nature.

171 Our findings indicated that prevalence rates in rodents are ranked highest to lowest by  
172 landscape type as follows: forest landscape > agricultural landscape > residential landscape,  
173 which is likely related to tick vector density and preferred habitat. This reiterates the need for  
174 individuals traveling into potential tick habitats, like the forest, to take proper protective  
175 measures to limit tick bite exposure. Sampling locations in this survey contained a broad  
176 range of altitudes from 500 meters to 4500 meters. Among the three altitude classes, small  
177 mammals with the highest prevalence of BBSL were found above 2500m. It was reported that  
178 *Ixodes ricinus* distribution in Sumava National Park extended toward higher altitudes,  
179 probably in relation to warming climates[23]. The roles temperature and humidity play in tick  
180 reproduction and reservoir preferences requires further investigation within these altitude  
181 ranges. Additionally, there are no reported human cases at these heights, which might reflect  
182 lower populations living in these areas.

183 Our study found five genospecies of BBSL in small mammals in Yunnan Province, four

184 of them except for *B. japonica*, have previously been associated with LB [24-25]. There exists  
185 a wide distribution and genetic diversity of BBSL in Yunnan, compared to only 1-2  
186 genospecies of BBSL in most provinces in China, such as Qinghai, Zhejiang, Guizhou and  
187 Guangxi. According to the sequence analysis carried out in this study, most of the *B. afzelii*  
188 sequences shared 99% identity with clinical isolates from patients in northeastern China [26].  
189 Most of the *B. burgdorferi* sensu stricto sequences were identical to the sequence from a  
190 human case reported in France (KY594010.1). At this time, there have been no confirmed  
191 patients with registered sequence of Lyme disease spirochetes in Yunnan province, requiring  
192 further investigation in the near future. The sequence of *B. valaisiana* obtained from small  
193 mammals cluster into two clades, one cluster within the sequence from Guizhou and Zhejiang  
194 province, the other three cluster fell within close proximity to sequences from Europe. Birds  
195 are major reservoirs for *B. valaisiana* in Europe, however the transmission cycle maintaining  
196 *B. valaisiana* in Yunan may be different from other areas, requiring additional study. *B.*  
197 *japonica* have only been found in Yunlong county, with this representing the first report  
198 documenting *B. japonica* in *Apodemus draco* and *Niviventer excelsior* in China. *B. garinii* is  
199 the most common genospecies in China, followed by *B. afzelii* [27]. However, we found that  
200 *B. afzelii* was the main genospecies detected in Yunnan, which is consistent with previous  
201 reports [4]. *B. burgdorferi* sensu stricto has been detected in *Sika deer* from Jilin and in  
202 *Caprolagu ssinensis* from Hunan, and detected in small mammals in Yunnan within the more  
203 populated counties of Gongshan, Deqin, and Weixi (S1, S2, S5) found in northwestern  
204 Yunnan. These findings reflect that Yunnan Province is of particular interest given its diverse  
205 topographic range and high level of biodiversity in small mammals that are potential  
206 reservoirs for BBSL.

207 In conclusion, Yunnan Province is an important natural foci of BBSL in China, and given  
208 the absence of reported human cases within this region, efforts to expand clinical surveillance

209 are needed immediately.

210

## 211 **Acknowledgements**

212 We thank Professor Zheng-da Gong for identification of rodent species.

## 213 **References**

- 214 1. Schwartz AM, Hinckley AF, Meadet PS, et al. Surveillance for Lyme Disease - United  
215 States, 2008-2015. *MMWR Surveill Summ* 2017;66(22):1-12.  
216 <http://doi.org/10.15585/mmwr.ss6622a1> PMID: 29120995
- 217 2. Leeftang MM, Ang CW, Berkhout J, et al. The diagnostic accuracy of serological tests  
218 for Lyme borreliosis in Europe: a systematic review and meta-analysis. *BMC Infect Dis*  
219 2016;16:140. <http://doi.org/10.1186/s12879-016-1468-4> PMID: 27013465
- 220 3. Toshiyuki M. Terrestrial distribution of the Lyme borreliosis agent *Borrelia burgdorferi*  
221 sensu lato in East Asia. *Jpn J Infect Dis* 2004;57(6):229-235. PMID: 15623946
- 222 4. Hao Q, Hou XX, Geng Z, et al. Distribution of *Borrelia burgdorferi* Sensu Lato in China.  
223 *J Clin Microbiol* 2011;49(2):647-650. <http://doi.org/10.1128/JCM.00725-10> PMID:  
224 21106783
- 225 5. Du CH, Yin JX, Zuo SQ, et al. Pathogen infection of small mammals from households in  
226 Western Yunnan Province. *Chin J Zoonoses* 2016;32(7):623-631 (in Chinese).  
227 <http://doi.org/10.3969/j.issn.1002-2694.2016.07.007>
- 228 6. Postic D, Assous MV, Grimont PA, et al. Diversity of *Borrelia burgdorferi* sensu lato  
229 evidenced by restriction fragment length polymorphism of rrf (5S)-rrl (23S) intergenic  
230 spacer amplicons. *Int J Syst Bacteriol* 1994;44(4):743-752.  
231 <http://doi.org/10.1099/00207713-44-4-743> PMID: 7981102
- 232 7. Tamura K, Peterson D, Peterson N, et al. MEGA5: molecular evolutionary genetics  
233 analysis using maximum likelihood, evolutionary distance, and maximum parsimony  
234 methods. *Mol Biol Evol* 2011;28(10):2731-2739. <http://doi.org/10.1093/molbev/msr121>  
235 PMID: 21546353
- 236 8. Wu XB, Na RH, Wei SS, et al. Distribution of tick-borne diseases in China. *Parasit*  
237 *Vectors* 2013;6:119. <http://doi.org/10.1186/1756-3305-6-119> PMID: 23617899
- 238 9. Wan KL, Zhang ZF, Li YL, et al. Lyme disease spirochete isolated from the kidney of  
239 *Rattus coxingi* in Sichuan province. *Chin J Vector Biol Control* 1991;2(6):384-385 (in  
240 Chinese).
- 241 10. Pan L, Yu ES. Study of Lyme Disease in Fujian Province. *Chin J Public Health*  
242 1992;11(5):271-272 (in Chinese).
- 243 11. Shi SZ, Liu ZJ, Sun Y, et al. Investigation on small animals infection of *Borrelia*  
244 *burgdorferi* in Diebu forest. *Chin J Hyg Insect Eq* 2004;10(4):220-221 (in Chinese).
- 245 12. Huang HN, Ding Z, He J, et al. Investigation on *Borrelia burgdorferi* infection in ticks  
246 and animals from a forest area of Jinlin province. *Chin J Zoonoses* 2006;22(8):785-788  
247 (in Chinese).
- 248 13. Zhang DC, Hong Y, Zhong ZQ, et al. Lyme disease spirochete isolated from Rodents  
249 and Ticks in Liaoning province. *Chin J Vector Biol Control* 1992;3(1):19 (in Chinese).
- 250 14. Hou XX, Geng Z, Hao Q, et al. Rats, the primary reservoir hosts of *Borrelia burgdorferi*,  
251 in six representative provinces, China. *Chin J Zoonoses* 2010;26(11):1034-1036 (in  
252 Chinese).
- 253 15. Meng Z, Jiang LP, Li ZL, et al. Infection with Lyme Spirochetes Detected in Rodents of  
254 Zhejiang Middle Area. *Chin J Health Lab Technol* 2010;20(10):2503-2505 (in Chinese).
- 255 16. Chen WS, Luo HM, He JF, et al. An Survey on Host and Vector of Lyme Disease in

- 256 Guangdong Province. Chin J Vector Biol Control 2000;11(3):190-193 (in Chinese).
- 257 17. Sala V, Favari ED. Epidemiology of Lyme Disease in Domestic and Wild Animals.
- 258 Open Dermatol J 2016;10(suppl):15-26. <http://doi.org/10.2174/1874372201610010015>
- 259 18. Zhang F, Wang W, Li L. *Borrelia burgdorferii* Infection and Genotypes in Ticks and
- 260 Rodents Collected in Qinghai Province. J Prev Med Chin PLA 2016;34(6):799-802 (in
- 261 Chinese).
- 262 19. Wang DM, Hao Q, Cai XH, et al. Study on ribotyping of Lyme borreliosis spirochete in
- 263 Guizhou province. Chin J Epidemiol 2003;24(12):1129-1131 (in Chinese).
- 264 20. Zhang JJ, Zhang F, Li L, et al. *Borrelia burgdorferi* infection and their genotypes in ticks
- 265 and rodents collected from Maijishan region, Gansu Province, China. Chin J Zoonoses
- 266 2015;31(4):357-360 (in Chinese).
- 267 <http://doi.org/10.3969/cjz.j.issn.1002-2694.2015.04.014>
- 268 21. Chu CY, He J, Zhao QM, et al. Molecular epidemiological studies on *Borrelia*
- 269 *burgdorferi* in rodents collected in the forest area of several provinces and autonomous
- 270 regions of China. Chin J Zoonoses 2006;22(9):817-820 (in Chinese).
- 271 22. Wulantuya, Gaowa, Yin XH, et al. Survey on *Borrelia* bacteria in rodents from Baynanur,
- 272 Inner Mongolia Autonomous Region. Chin J Vector Control 2018;29(3):239-241 (in
- 273 Chinese).
- 274 23. Daniel M, Danielová V, Kříž B, et al. Shift of the Tick *Ixodes ricinus* and Tick-Borne
- 275 Encephalitis to Higher Altitudes in Central Europe. Eur J Clin Microbiol Infect Dis
- 276 2003;22(5):327-328. <http://doi.org/10.1007/s10096-003-0918-2> PMID: 12736793
- 277 24. Rudenko N, Golovchenko M, Grubhoffer L, et al. Updates on *Borrelia burgdorferi sensu*
- 278 *lato* complex with respect to public health. Ticks Tick Borne Dis. 2011;2(3):123-128.
- 279 <http://doi.org/10.1016/j.ttbdis.2011.04.002> PMID: 21890064
- 280 25. Diza E, Papa A, Vezyriet E, et al. *Borrelia valaisiana* in cerebrospinal fluid. Emerg Infect
- 281 Dis 2004;10(9):1692-1693. <http://doi.org/10.3201/eid1009.030349> PMID: 15503409
- 282 26. Ni XB, Jia N, Jiang BG, et al. Lyme borreliosis caused by diverse genospecies of
- 283 *Borrelia burgdorferi sensu lato* in northeastern China. Clin Microbiol Infect 2014;20(8):
- 284 808-814. <http://doi.org/10.1111/1469-0691.12532> PMID: 24438159
- 285 27. Fang LQ, Liu K, Li XL, et al. Emerging tick-borne infections in mainland China: an
- 286 increasing public health threat. Lancet Infect Dis 2015;15(12):1467-1479.
- 287 [http://doi.org/10.1016/S1473-3099\(15\)00177-2](http://doi.org/10.1016/S1473-3099(15)00177-2) PMID: 26453241

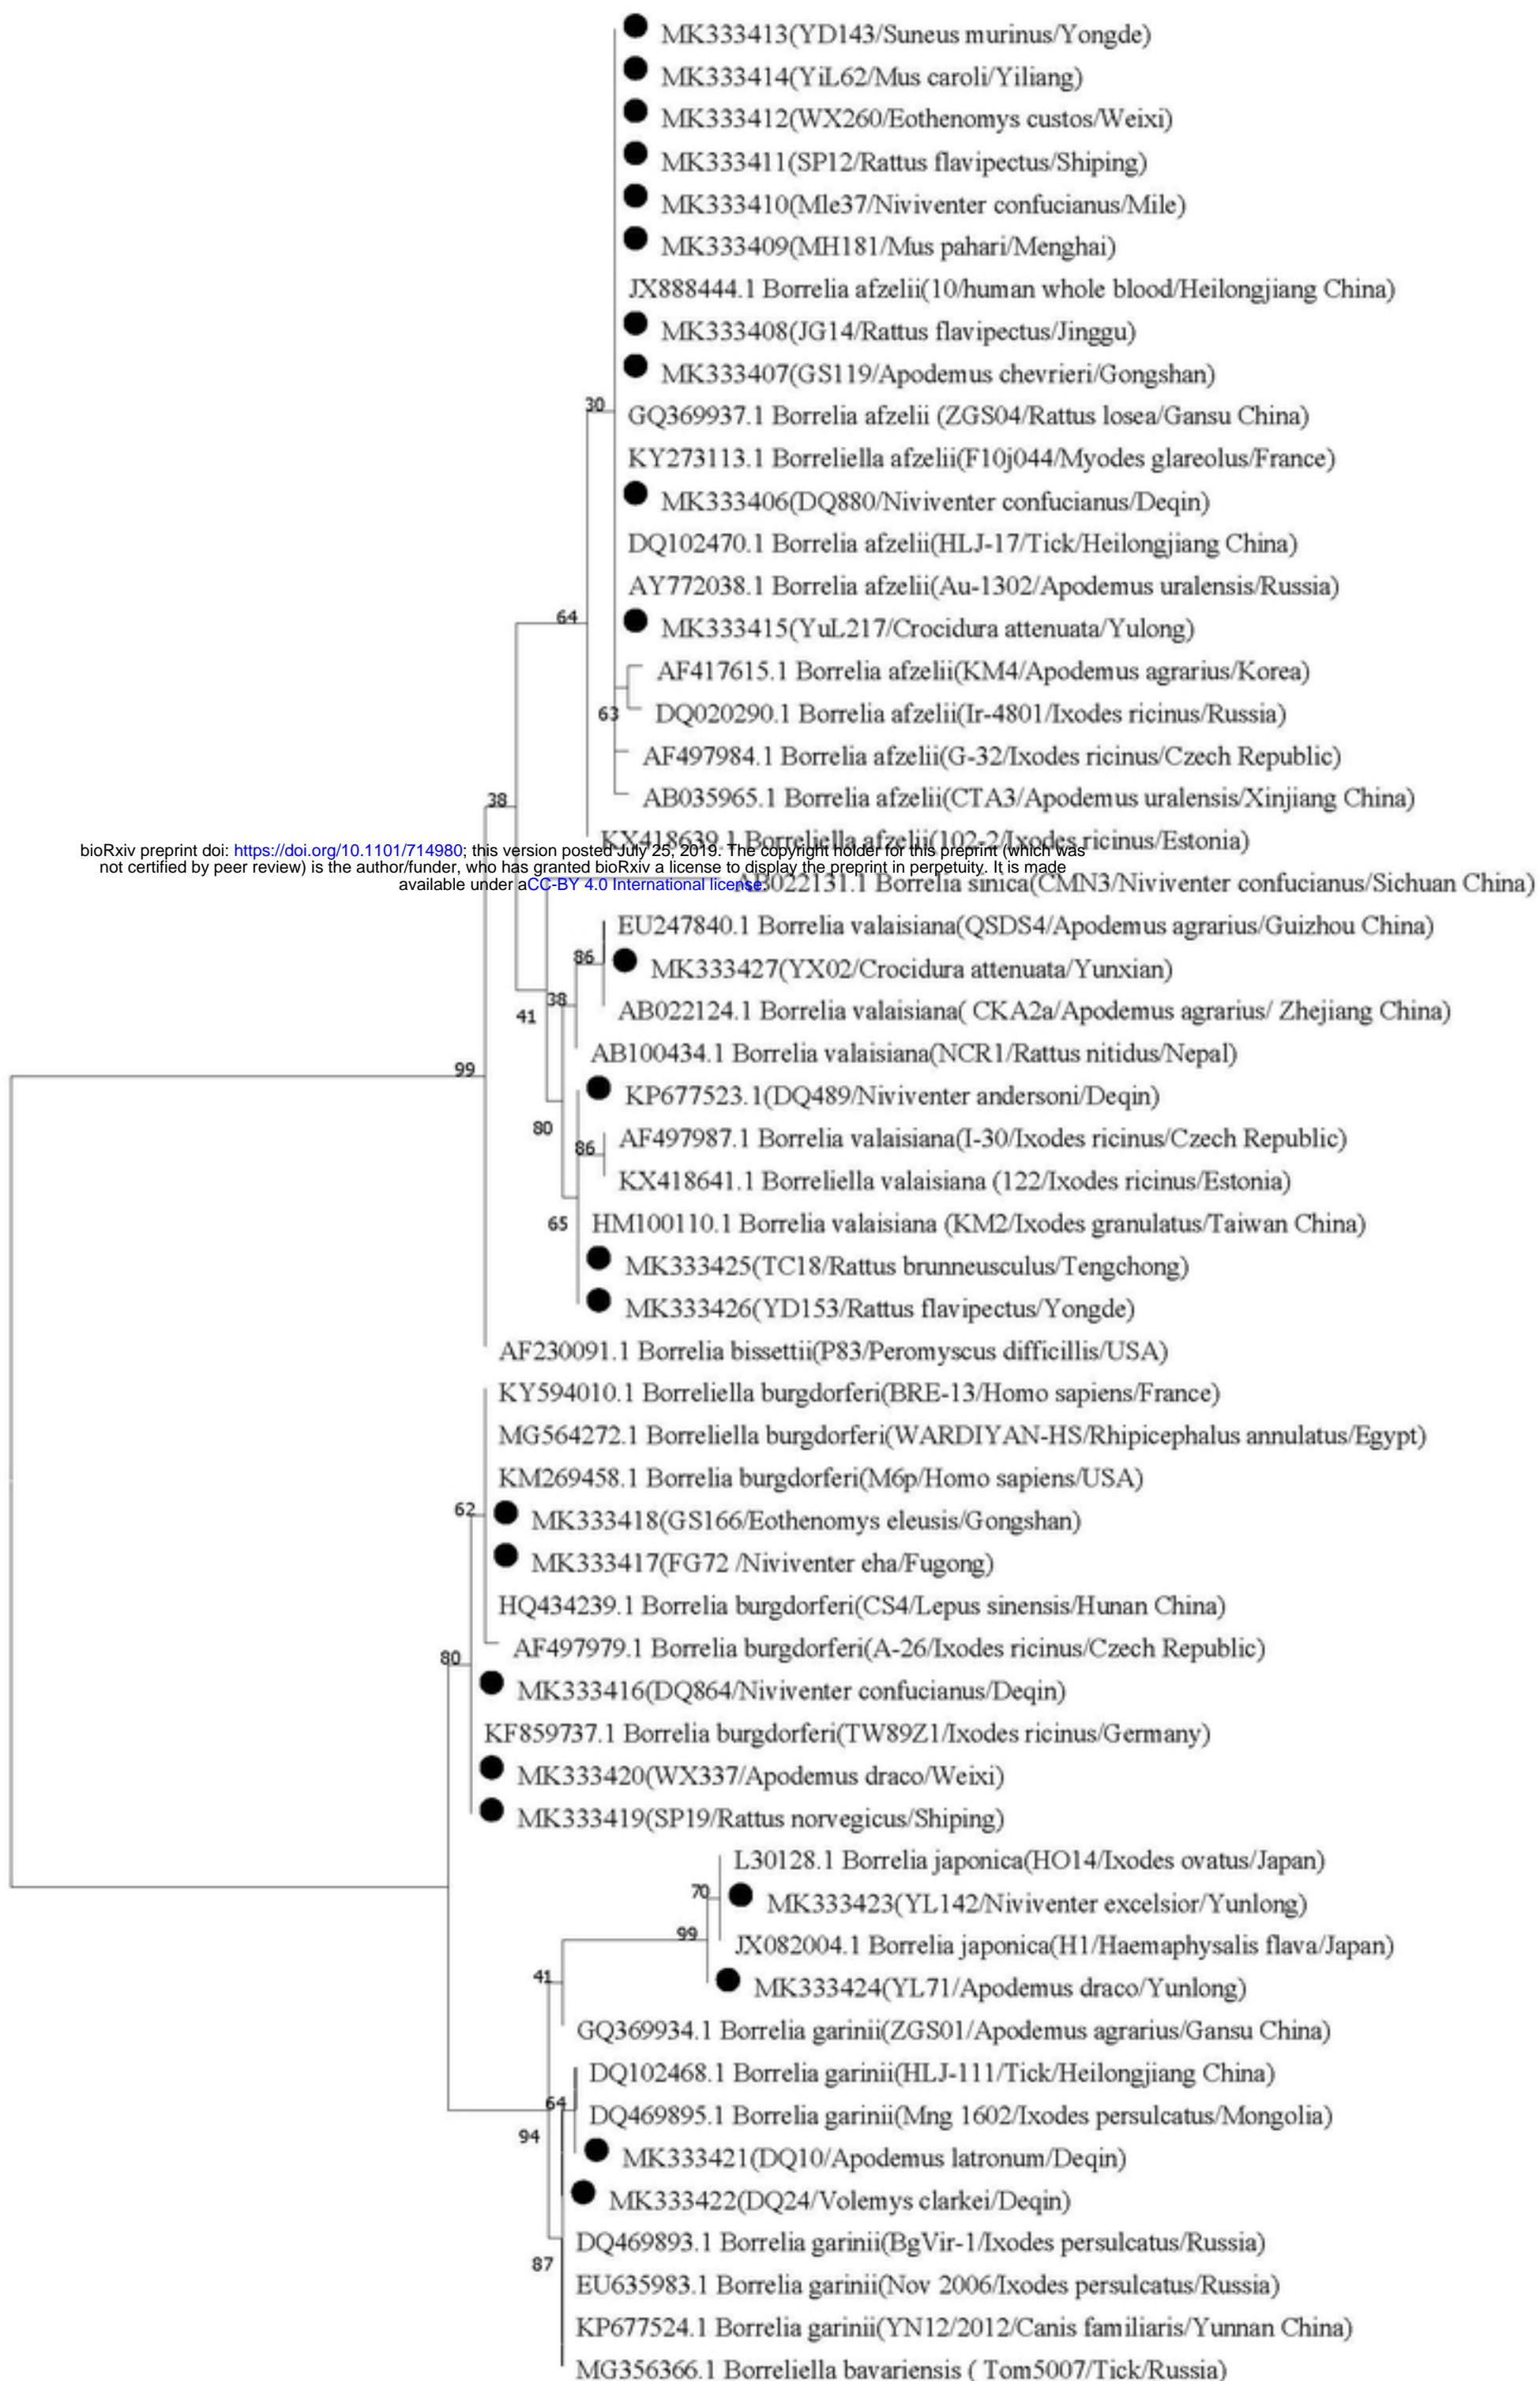

Figure 1
